# Supplementary material for: Comparative Analytical Evaluation of Four Centralized Platforms for the Detection of Mycobacterium tuberculosis Complex and Resistance to Rifampicin and Isoniazid
Source: PubMed Central journal article supplement (PMC8106716; doi:10.1128/jcm.02168-20), 2021-02-18
Supplement: JCM.02168-20-s0001.pdf [file JCM.02168-20-s0001.pdf]

## 1 **Supplementary appendix**

### 2 **Introduction**

3 *Additional information on instruments and assays:*

4 The automated RealTime MTB assay (Abbott Molecular Inc., DesPlaines, IL, USA) assay can  
5 diagnose MTBC in high throughput mode (96 specimens including two assay controls), with  
6 software-guided positive specimens reflexed to the RealTime MTB RIF/INH Resistance assay  
7 (24 samples including two assay controls) for full MDR-TB diagnosis within 10.5 hours. DNA  
8 extraction and PCR preparation are first performed by the Abbott *m2000sp* instrument, after  
9 which the PCR plate is sealed and transferred to the *m2000rt* instrument for real-time PCR and  
10 automated interpretation of the test results. For the diagnosis of MTBC, the assay targets the  
11 insertion element *IS6110* as well as the *pab* gene. As a reflex test the detection of resistance to  
12 rifampicin and isoniazid the assay targets the *rpoB* gene, and the *katG* gene and *inhA* promoter  
13 region, respectively. If the reflex assay is not pre-selected upfront during the MTB test, DNA  
14 extraction for the reflex MTB RIF/INH Resistance assay has to be performed separately.  
15 Additional information regarding the internal process control and number of assay controls per  
16 run can be found in the package insert.

17

18 The Hain Lifescience (Hain) FluoroType MTBDR assay (Hain Lifescience, Nehren, Germany)  
19 uses Linear After The Exponential (LATE)-PCR amplification and lights-on/lights-off  
20 chemistry to detect MTBC by targeting the *rpoB* gene. Detection of resistance to rifampicin  
21 and isoniazid is performed through targeting the *rpoB* gene, and the *katG* gene and *inhA*  
22 promoter region. The high throughput platform can include up to 96 samples (including assay  
23 controls) per run and reports results within 4 hours. The run report includes the specific  
24 mutations identified for the three gene targets. DNA extraction and PCR preparation is

25 performed by the GenoXtract 96 (GXT96) instrument, after which the PCR plate is transferred  
26 to the FluoroCycler XT instrument for the FluoroType MTBDR assay.

27

28 The Becton Dickson (BD) MAX MDR-TB assay (Becton, Dickinson and Company, BD Life  
29 Sciences-Integrated Diagnostic Systems, Québec, Canada) is a real-time PCR assay that can  
30 be performed on the BD MAX System (Becton, Dickinson and Company, BD Life Sciences-  
31 Integrated Diagnostic Systems, Sparks, MD, USA) to detect MTBC through targeting *IS6110*  
32 and *IS1081*. Detection of resistance to rifampicin and isoniazid is performed through targeting  
33 the *rpoB* gene, and the *katG* gene and *inhA* promoter region. The assay can include up to 24  
34 sputum samples per run and reports results within 4 hours. The assay also includes a Sample  
35 Processing Control that is provided in the Extraction Tube and subjected to extraction,  
36 concentration and amplification steps. The Sample Processing Control monitors for the  
37 presence of potential inhibitory substances as well as system or reagent failures. Both DNA  
38 extraction and the BD MAX MDR-TB assay procedures are done automatically by the BD  
39 MAX System. The BD MAX system has the ability to run multiple specimen types and assays  
40 in a single run. The BD MAX system has semi-random-access ability as a second run of 24  
41 samples can be loaded once the first batch has been extracted and PCR for the first batch has  
42 started.

43

44 The Roche cobas MTB assay (Roche Molecular Systems, New Jersey, USA) uses real-time  
45 PCR for MTBC detection by targeting 16S rRNA and 5 *esx* genes and can generate results for  
46 96 tests (including assay controls) in one 3.5 hour run. MTBC positive specimens are reflexed  
47 to the RIF/INH assay (96 tests including assay controls per run) for MDR-TB diagnosis in an  
48 additional 3.5 hours. The assay targets the *rpoB* gene, and the *katG* gene and *inhA* promoter  
49 region for detection of resistance to rifampicin and isoniazid. DNA extraction, PCR preparation

50 and the cobas MTB and MTB-RIF/INH assays are performed in cobas 6800/8800 systems. The  
51 cobas 6800/8800 systems allow for random access and the ability to test multiple assays in a  
52 run.

53

54

55 **Methods**

56 *Additional information on workflows:*

57 ***BD-MAX MDR-TB***

58 The spiked negative sputa and *M. tuberculosis* isolates were treated with the BD MAX-STR  
59 reagent (Becton, Dickinson and Company, BD Life Sciences-Integrated Diagnostic Systems,  
60 Sparks, MD, USA) to a final ratio of STR:sample of 2:1, mixed by shaking the enclosed sample  
61 tube vigorously 10 times, followed by 5 minutes incubation at room temperature. The sample  
62 tube was then shaken vigorously 10 times before further incubation for 25 minutes at room  
63 temperature. A final volume of 2.5 mL of the STR-treated sample was then transferred to the  
64 BD MAX MDR-TB Sample Tube and closed with the septum cap. The BD MAX MDR-TB  
65 Unitized Reagent Strip and Sample Tube was subsequently loaded on the BD MAX instrument  
66 for analysis.

67

68 ***FluoroType MTBDR***

69 The spiked negative sputa were treated with the Liquefaction reagent to have a final ratio of  
70 Liquefaction reagent:sample of 2:1 and mixed by vortexing for 30 to 60 seconds, followed by  
71 15 to 20 minutes incubation at room temperature. A final volume of 700 µl of the liquefied  
72 sample was then transferred to a Copan sample and directly used using the GXT96 X2  
73 Extraction Kit on the GenoXtract 96 instrument.

74 The *M. tuberculosis* isolates were treated with the Inactivation set (Hain Lifescience GmbH,  
75 Nehren, Germany) by adding the Inactivation Reagent to the sample to achieve a final  
76 concentration of 25% (e.g. 500 µl sample and 167 µl Inactivation Reagent). The treated sample  
77 was then mixed by vortexing for 5 to 10 seconds and incubated at room temperature for 30  
78 minutes.

79 Subsequent DNA extraction and Fluorotype MTBDR PCR preparation by the GenoXtract 96  
80 instrument, the PCR plate was removed from the instrument and sealed. FluoroType MTBDR  
81 testing was done in the FluoroCycler XT. The provided positive control was included in each  
82 run.

83

#### 84 ***Abbott RealTime MTB and Realtime MTB-RIF/INH***

85 The spiked negative sputa and *M. tuberculosis* isolates were treated with the inactivation  
86 reagent (IR) to have a final ratio of IR:sample of 3:1 and mixed by vortexing for 20 to 30  
87 seconds. The mixture was then incubated at room temperature for 1 hour, with mixing of the  
88 solution at 20 minutes in the incubation period (vortexing for 20 to 30 seconds). The IR-treated  
89 sample was then transferred to a reaction vessel and DNA extraction and PCR preparation was  
90 performed using the *m2000sp* instrument. RealTime MTB and Realtime MTB-RIF/INH testing  
91 was performed using the *m2000rt* instrument. The provided positive and negative controls were  
92 included in each run.

93

#### 94 ***Cobas MTB and cobas MTB-RIF/INH***

95 The spiked negative sputa and *M. tuberculosis* isolates were treated with the cobas MIS reagent  
96 to have a final ratio of MIS:sample of 2:1 and mixed by vigorous shaking 10 to 20 times or  
97 vortexing for 30 to 60 seconds followed by incubation at room temperature for 60 minutes. The  
98 treated sample was then transferred to a screw secondary tube and sonicated for 5 minutes,  
99 followed by centrifugation for 1 minute at 3000 rcf. The sample tube was then loaded on the  
100 cobas 6800 instrument. The provided positive and negative controls were included in each run.

101

102 *Detailed description of stages of LOD experiments:*

- 103 (i) Dynamic range: The centralized assay solutions and Xpert MTB/RIF were first evaluated  
104 by spiking controlled bacterial concentrations using 10-fold serial dilutions in phosphate  
105 buffer. The dilution series included concentrations of 0, 5, 10, 50, 10<sup>2</sup>, 10<sup>3</sup>, 10<sup>4</sup> and 10<sup>5</sup>  
106 genomes/mL. Testing was done in triplicate.
- 107 (ii) Target range concentration confirmation: These experiments were done to refine the  
108 concentrations to be tested in the LOD experiment. Five concentrations were selected  
109 between the lowest dilution showing 100% positivity and the highest dilution showing  
110 less than 100% positivity in the dynamic range experiments. Intermediate dilution sets  
111 (10x that of the desired concentration range) were first prepared in phosphate buffer and  
112 subsequently spiked into the TB-negative sputum aliquots. Each concentration was tested  
113 with five replicates. Three replicates of TB-negative sputum mixed with phosphate buffer  
114 were used as negative controls.
- 115 (iii) In case of inconsistent results observed in the target range concentration confirmation  
116 experiments, selection of the target range dilution series and testing was repeated before  
117 proceeding to the LOD experiment.
- 118 (iv) LOD experiment: From the results of target range concentration confirmation  
119 experiments, five concentrations were selected around the estimated LOD. This included  
120 two concentrations above (with one selected to have 100% positivity) and two  
121 concentrations below (with one selected to have 0% positivity) the estimated LOD.  
122 Intermediate dilutions (10x that of the desired concentration range) were prepared in  
123 phosphate buffer and subsequently spiked into the TB-negative sputum aliquots. Each  
124 concentration was tested with 20 replicates. One sputum sample mixed with phosphate  
125 buffer was used as negative control.

126

127 **Supplementary Tables**128 **Table S1: Mycobacterium genomic regions targeted by the different platforms**

| <b>Assay</b>          | <b>MTBC Target</b>                                                               | <b>Multi-copy target</b>  | <b>DNA extraction method</b>                                                                                                                                                     |
|-----------------------|----------------------------------------------------------------------------------|---------------------------|----------------------------------------------------------------------------------------------------------------------------------------------------------------------------------|
| Roche cobas MTB       | 16S rRNA, <i>esxJ</i> , <i>esxK</i> ,<br><i>esxM</i> , <i>esxP</i> , <i>esxW</i> | No; 6 single copy targets | Bacterial cell lysis is done chemically (lysis reagent), enzymatically (proteinase) and physically (sonication). Released bacterial DNA is captured by magnetic glass particles. |
| BD MAX MDR-TB         | <i>IS6110</i> , <i>IS1081</i>                                                    | Yes                       | Bacterial cell lysis are done chemically and by heat. Released nucleic acids are then captured by magnetic affinity beads.                                                       |
| Hain FluoroType MTBDR | <i>rpoB</i>                                                                      | No                        | Capturing of intact cells to magnetic beads, from where the cells are washed and then lysed.                                                                                     |
| Abbott RealTime MTB   | <i>pab</i> , <i>IS6110</i>                                                       | Yes                       | Cell lysis and capturing of bacterial DNA to magnetic micro particles.                                                                                                           |

129

130

131 **Table S2: Limit of detection and clinical performance as per instructions for use**

| <b>Assay</b>        | <b>LOD as per IFU (CFU/mL) for MTBC detection</b> | <b>Performance as per IFU</b> |                                   |                                   |                            |
|---------------------|---------------------------------------------------|-------------------------------|-----------------------------------|-----------------------------------|----------------------------|
|                     |                                                   | <b>Overall Sensitivity</b>    | <b>Sensitivity Smear-positive</b> | <b>Sensitivity Smear-negative</b> | <b>Overall Specificity</b> |
| Roche cobas MTB     | 8.8                                               | 92.2-94.9%*                   | 98.9-99.3%*                       | 78.4-86.6%*                       | 97.2-97.9%*                |
| FluoroType MTBDR    | 14-24*                                            | -                             | -                                 | -                                 | -                          |
| BD MAX MDR-TB       | 0.5                                               | 94.7-96.9%*                   | 98.3-99.2%*                       | 88.5%-90.3%*                      | 94.7%-96.9%*               |
| Abbott RealTime MTB | 17                                                | 93%                           | 99                                | 81                                | 97%                        |
| Xpert MTB/RIF       | 131                                               | -                             | 99.7%                             | 76.1%                             | 98.8%                      |

132 - = not reported in IFU; LOD = Limit of Detection; IFU = Instructions for Use; \*Depending on

133 sample type (raw and processed sputum)

134

135

136

137

138 **Table S3: Copy number per MTBC target characteristics per strain used in the limit of**  
 139 **detection evaluation**

| Target                                        | Copy number per MTBC target     |                                             |
|-----------------------------------------------|---------------------------------|---------------------------------------------|
|                                               | <i>M. tuberculosis</i><br>H37Rv | <i>M. bovis</i>                             |
| 16S rRNA                                      | 1                               | 1                                           |
| <i>esxJ, esxK, esxM, esxP,</i><br><i>esxW</i> | 1 copy of each                  | 1 copy of <i>esxJ, esxK,</i><br><i>esxM</i> |
| IS6110                                        | 15                              | 1                                           |
| IS1081                                        | 6                               | 6                                           |
| <i>rpoB</i>                                   | 1                               | 1                                           |
| <i>pab</i>                                    | 1                               | 1                                           |

140

141

142 **Table S4: Limit of detection relative to Xpert MTB/RIF for MTBC detection**

| Limit of detection for MTBC detection relative to Xpert MTB/RIF |                     |               |                 |                                   |      |
|-----------------------------------------------------------------|---------------------|---------------|-----------------|-----------------------------------|------|
| Comparator assay                                                | Centralized assays  |               |                 |                                   |      |
| Xpert MTB/RIF                                                   | Abbott RealTime MTB | BD MAX MDR-TB | Roche cobas MTB | Hain Lifescience FluoroType MTBDR |      |
| <i>M. tuberculosis</i><br>H37Rv                                 | 1                   | 0.09          | 0.22            | 0.64                              | 2.75 |
| <i>M. bovis</i>                                                 | 1                   | 0.75          | 1.47            | 0.73                              | 7.91 |

143

144

145 **Table S5: Ziehl-Neelsen staining and smear microscopy results for a dilution series of the**  
 146 **H37Rv panel strain used in the analytical evaluation**

147

| H37Rv concentration (genomes/mL) | AFB microscopy result |
|----------------------------------|-----------------------|
| 10 <sup>8</sup> genomes/mL       | Positive smear 3+     |
| 10 <sup>6</sup> genomes/mL       | Scanty                |
| 10 <sup>5</sup> genomes/mL       | Negative              |

148



149 **Supplementary figures**

150

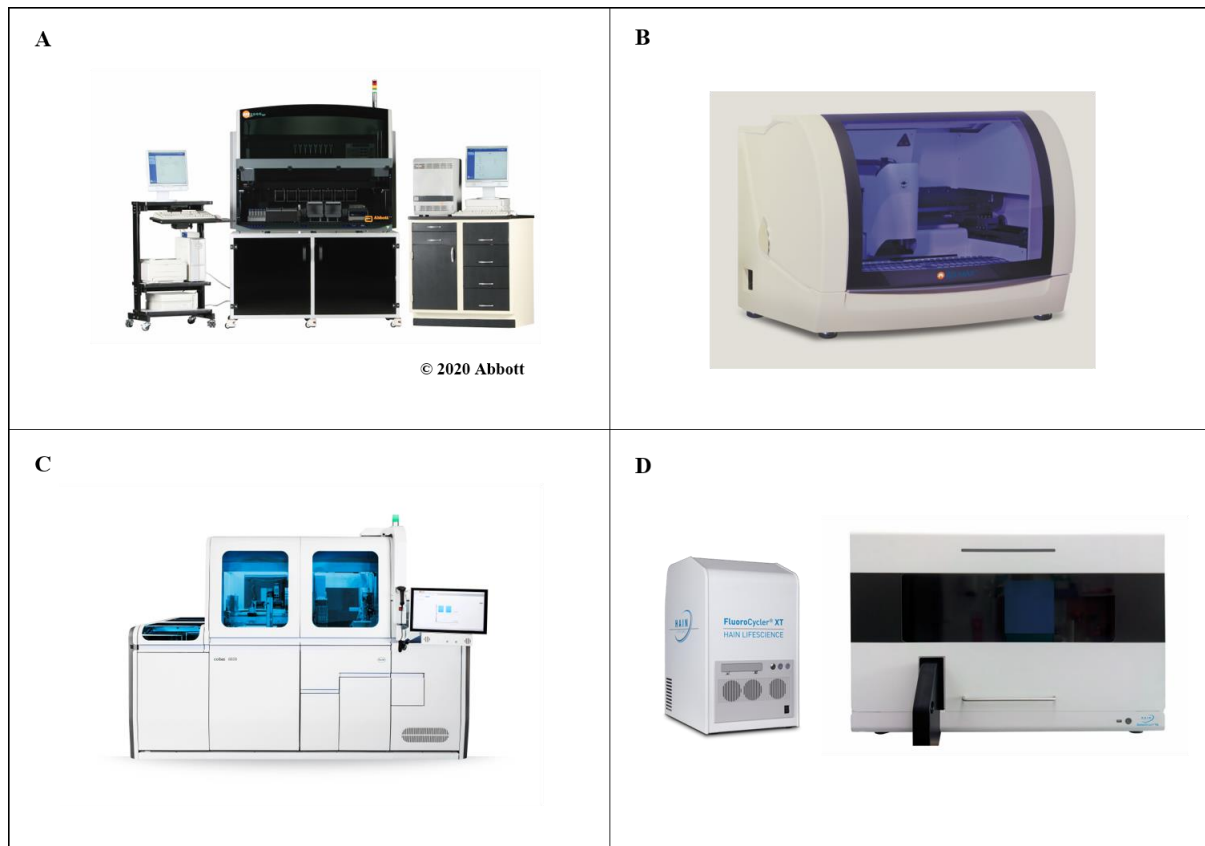

151

152 **Figure S1: Centralized TB assays for the detection of TB and resistance to rifampicin and**  
153 **isoniazid:** (A) Abbott *m2000sp* and *m2000rt* [Dimensions: *m2000sp*: 145cm (Width) X 80cm  
154 (Depth) X 177cm (Height) (excluding PC and monitor); *m2000rt*: 34cm (Width) X 45cm  
155 (Depth) X 49cm (Height) (excluding PC with monitor)]; (B) BD MAX™ System [Dimensions:  
156 114cm(Width) X 170cm (Depth) X 84cm (Height)]; (C) Roche cobas® 6800 (required ultra  
157 sonicator not shown) [Dimensions: Cobas 6800: 452cm (Width) X 309cm (Depth) X 216cm  
158 (Height); Ultra sonicator (not shown): 74cm (Width) X 45cm (Height) X 34cm (Depth)]; (D)  
159 Hain Lifescience FluoroCycler® XT and GenoXtract® 96 [Dimensions: GenoXtract 96: 112.3cm  
160 (Width) X 82.5cm (Depth) X 77.4cm (Height) (excluding monitor); FluoroCycler XT: 42cm  
161 (Width) X 73cm (Height) X 57cm (Depth) (excluding PC with monitor)]. Material is  
162 reproduced with permission from Abbott GmbH; Becton, Dickinson and Company; Hain  
163 Lifescience and Roche Molecular Systems Inc.

164

165

166

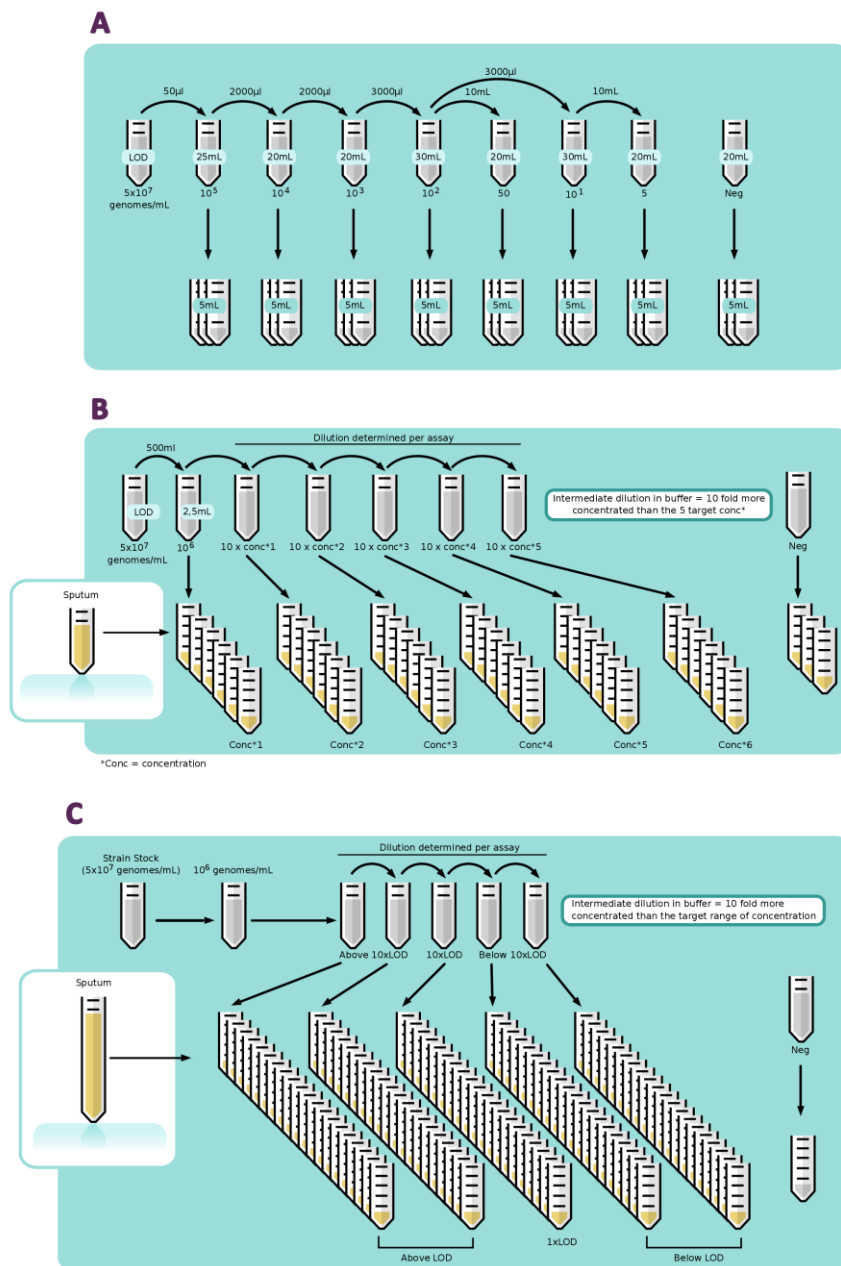

167

168

169 **Figure S2: Schematic overview of LOD experiments:** (A) Dynamic range experiments:

170 Bacterial stocks were serially diluted in phosphate buffer. Testing was done in triplicate; (B)

171 Target range experiments: Five concentrations were tested with five replicates in sputum.

172 Intermediate 10x dilutions were first made in phosphate buffer and subsequently spiked into

173 sputum; (C) LOD experiments: Five concentrations were selected around the presumptive

174 LOD. The five selected concentrations included two concentrations above the presumptive

175 LOD (with one selected to have 100% positivity) and two concentrations below the  
176 presumptive LOD (with one selected to have 0% positivity). Intermediate 10x dilutions were  
177 first prepared in phosphate buffer and subsequently spiked into the TB-negative sputum  
178 aliquots.  
179

H37Rv Limit of detection

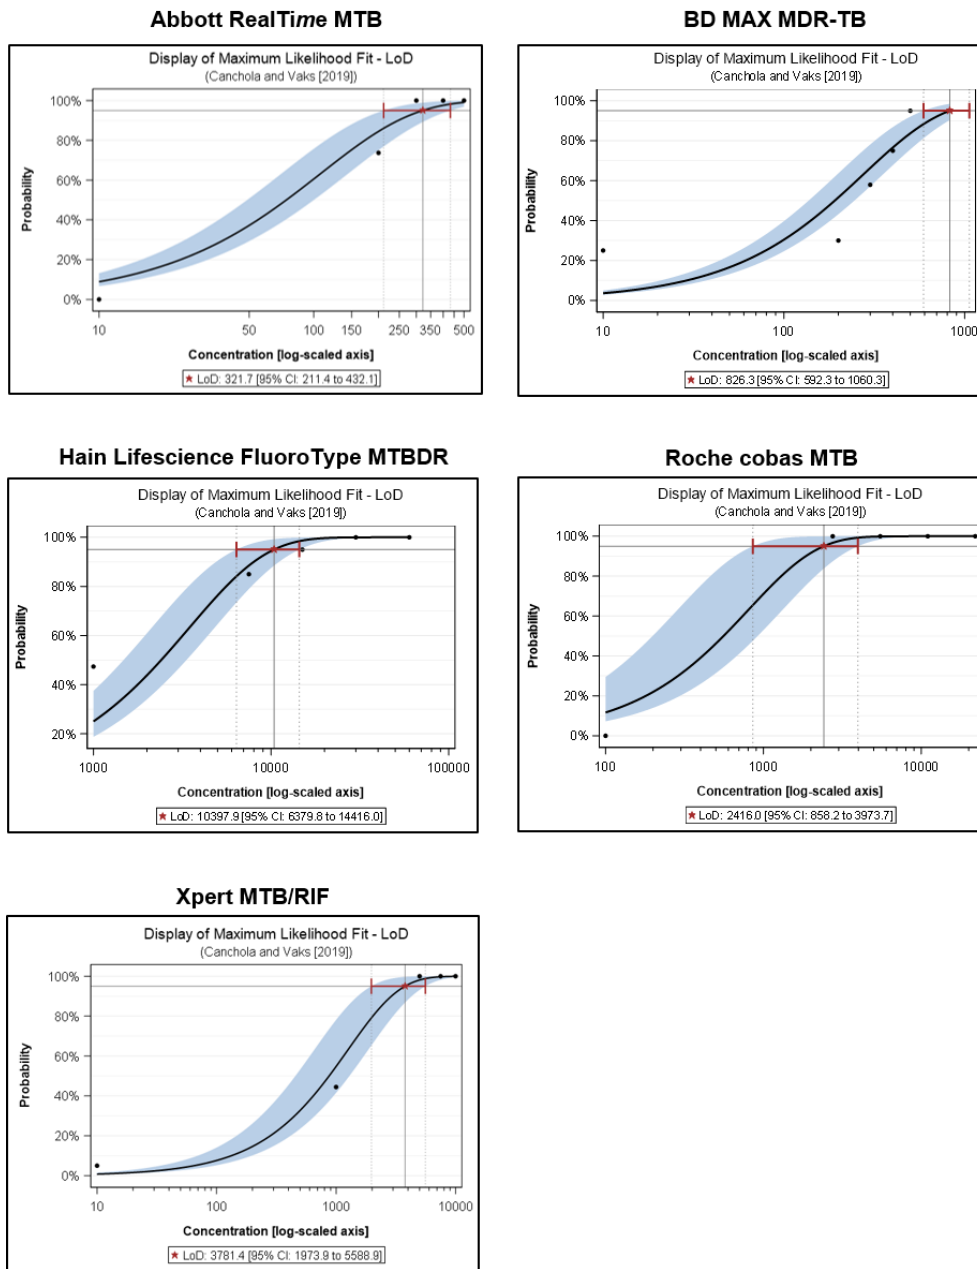

181

182

183 **Figure S3: LOD<sub>95</sub> of Abbott RealTime MTB, BD MAX MDR-TB, Roche cobas MTB, Hain**

184 **Lifescience FluoroType MTBDR and Xpert MTB/RIF when testing *M. tuberculosis* H37Rv. Red**

185 **dot: calculated LOD<sub>95</sub>, Red line: 95% confidence interval**

186

**M. bovis Limit of detection**

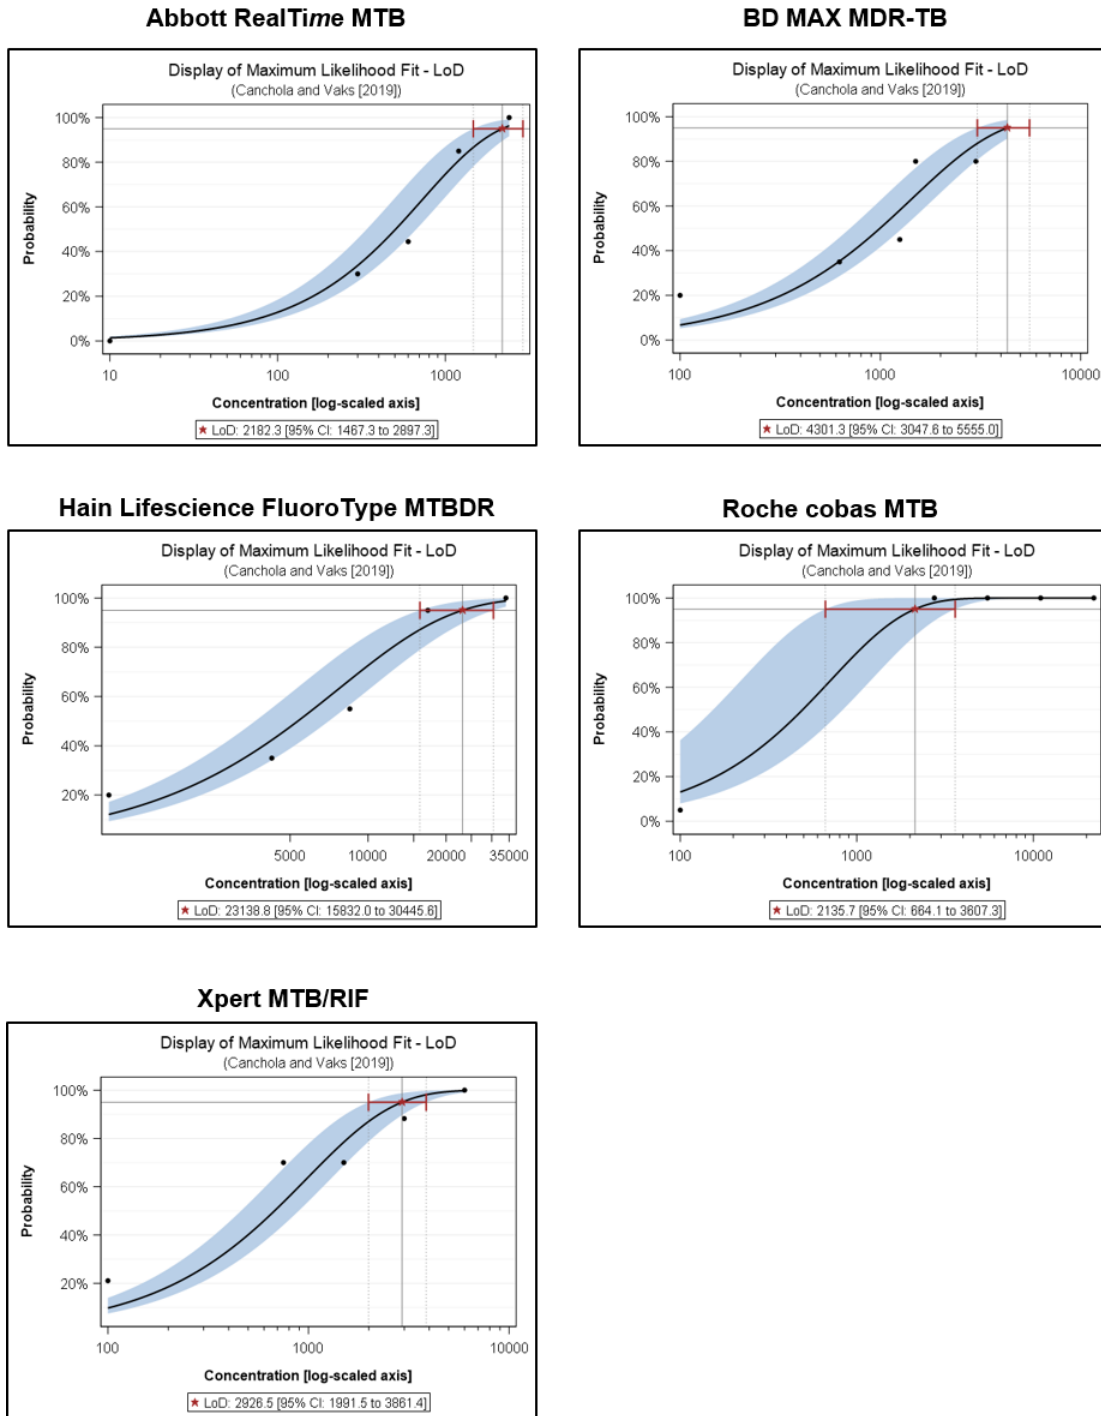

187

188

189 **Figure S4: LOD<sub>95</sub> of Abbott RealTime MTB, BD MAX MDR-TB, Roche cobas MTB, Hain**

190 **Lifescience FluoroType MTBDR and Xpert MTB/RIF when testing *M. bovis*. Red dot:**

191 **calculated LOD<sub>95</sub>, Red line: 95% confidence interval**

192
